# Supplementary material for: Engaging Canadians in evidence-based communication about vaccines: a scoping review protocol of immunisation support programs in Canada
Source: HighWire-hosted journal article supplement (doi:10.1136/bmjopen-2021-060103), 2022-04-01
Supplement: bmjopen-2021-060103supp002_data_supplement.pdf [file bmjopen-2021-060103supp002_data_supplement.pdf]

**Appendix II: Data extraction instrument**

| <b>Domain</b>                                 | <b>Extraction</b>                                                             |
|-----------------------------------------------|-------------------------------------------------------------------------------|
| Article Characteristics                       | Article ID number (from Covidence)                                            |
|                                               | Authors                                                                       |
|                                               | Year of publication                                                           |
|                                               | Publication journal                                                           |
|                                               | Full citation (e.g., author(s), date, title, journal, volume, issue, pages)   |
|                                               | Study design                                                                  |
|                                               | Study objective(s) (including aim/purpose)                                    |
|                                               | Research question(s)                                                          |
|                                               | Methodology (including philosophical perspective)                             |
| Program/Intervention/Strategy Characteristics | Name of program/intervention/strategy                                         |
|                                               | Program description                                                           |
|                                               | Target population and participant details (e.g., age, sex, number)            |
|                                               | Delivery format (i.e., virtual, in-person, or mixed)                          |
|                                               | Program delivery personnel and team format (e.g., public health nurses, etc)  |
|                                               | Setting (e.g., clinical, community, etc)                                      |
|                                               | Context                                                                       |
|                                               | Geographical location (e.g. region, country)                                  |
|                                               | Vaccine type(s)                                                               |
|                                               | Data analysis                                                                 |
|                                               | Outcome measures                                                              |
|                                               | Reported barriers/facilitators to intervention implementation and/or delivery |
|                                               | Author's conclusion (i.e., reported key findings)                             |
|                                               | Implications                                                                  |
|                                               | Identified limitations                                                        |
|                                               | Reviewer's comments                                                           |
